# Supplementary material for: Primary and recurrent ovarian high-grade serous carcinomas display similar microRNA expression patterns relative to those of normal ovarian tissue
Source: PubMed Central journal article supplement (PMC5342571; doi:10.18632/oncotarget.12045), 2016-09-15
Supplement: oncotarget-07-70524-s001.pdf [file oncotarget-07-70524-s001.pdf]

## Primary and recurrent ovarian high-grade serous carcinomas display similar microRNA expression patterns relative to those of normal ovarian tissue

### SUPPLEMENTARY TABLES

Supplementary Table S1: Characteristics of patients with primary ovarian HGSC

| Patient Number | Stage | Grade | Date of primary surgery |
|----------------|-------|-------|-------------------------|
| AOC-a          | IV    | 3     | 2011-1-17               |
| AOC-b          | IIIC  | 2     | 2010-3-29               |
| AOC-c          | IIIC  | 2     | 2009-6-1                |
| AOC-d          | IIIC  | 3     | 2010-2-15               |
| AOC-e          | IIIC  | 3     | 2009-8-11               |

**Supplementary Table S2: Increased miRNAs in primary and recurrent ovarian HGSC compared with normal ovarian tissue**

See Supplementary File 1

**Supplementary Table S3. Decreased miRNAs in primary and recurrent ovarian HGSC compared with normal ovarian tissue**

See Supplementary File 2

Supplementary Table S4: P-values and false discovery rates (FDRs) for specific miRNAs shown in Figure 5

| <b>Normal ovarian tissue (n = 4) vs. primary HGSC (n = 8)</b>   |                |                      |
|-----------------------------------------------------------------|----------------|----------------------|
| <b>Gene</b>                                                     | <b>P-value</b> | <b>q-value (FDR)</b> |
| <i>miR-141-3p</i>                                               | 0.000595       | 0.000991             |
| <i>miR-200c-3p</i>                                              | 0.000367       | 0.000917             |
| <i>miR-204-5p</i>                                               | 0.008053       | 0.008053             |
| <i>miR-205-5p</i>                                               | 0.007306       | 0.008053             |
| <i>miR-429</i>                                                  | 0.000004       | 0.000021             |
| <b>Normal ovarian tissue (n = 4) vs. recurrent HGSC (n = 8)</b> |                |                      |
| <b>Gene</b>                                                     | <b>P-value</b> | <b>q-value (FDR)</b> |
| <i>miR-141-3p</i>                                               | 0.001064       | 0.001595             |
| <i>miR-200c-3p</i>                                              | 0.000821       | 0.002462             |
| <i>miR-205-5p</i>                                               | 0.043884       | 0.043884             |
| <i>miR-429</i>                                                  | 0.002341       | 0.002809             |
| <i>miR-506-3p</i>                                               | 0.000899       | 0.001595             |
| <i>miR-509-3p</i>                                               | 0.000386       | 0.002318             |
| <b>Primary HGSC (n = 8) vs. recurrent HGSC (n = 8)</b>          |                |                      |
| <b>Gene</b>                                                     | <b>P-value</b> | <b>q-value (FDR)</b> |
| <i>miR-370</i>                                                  | 0.009872       | 0.012340             |
| <i>miR-506-3p</i>                                               | 0.019220       | 0.019220             |
| <i>miR-509-3p</i>                                               | 0.006766       | 0.012744             |
| <i>miR-575</i>                                                  | 0.001498       | 0.007488             |
| <i>miR-630</i>                                                  | 0.007647       | 0.012340             |
